# Supplementary material for: Halogen-bonded liquid-crystalline complexes formed from 4-alkoxyphenylpyridines with iodine and with interhalogens
Source: Royal Society of Chemistry journal article supplement (doi:10.1039/d2ce01555b), 2023-01-01
Supplement: d2ce01555b1.pdf [file d2ce01555b1.pdf]

# **Halogen-bonded Liquid-crystalline Complexes Formed from 4-Alkoxyphenylpyridines with Iodine and with Interhalogens**

**Linda J. McAllister, James Taylor, Natalie E. Pridmore,**

**Alice J. McEllin, Adrian C. Whitwood, Peter B. Karadakov\* and Duncan W. Bruce\***

Department of Chemistry  
University of York  
Heslington  
YORK YO10 5DD (UK)  
Tel: (+44) 1904 324085  
E-mail: [duncan.bruce@york.ac.uk](mailto:duncan.bruce@york.ac.uk)

**Supplementary Information**

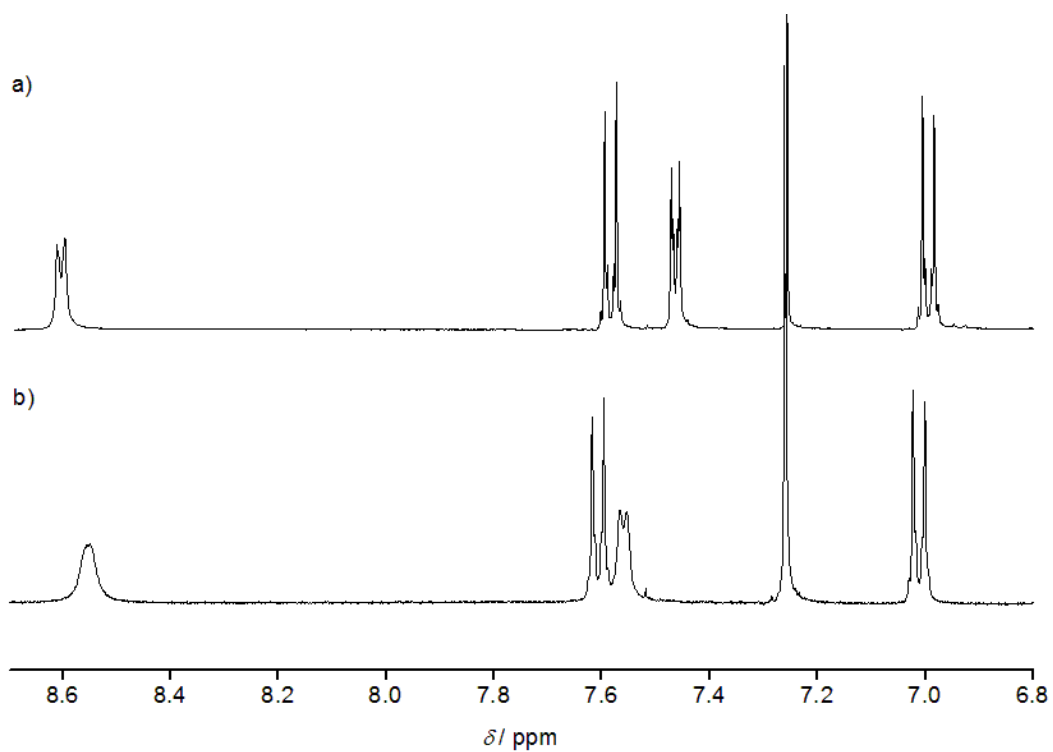

Figure S1 The aromatic region of the  $^1\text{H}$  NMR spectrum of a) dodecyloxyphenylpyridine (12-OPhPy) and b) its complex with bromine (12-OPhPy $\cdots$ Br $_2$ ).

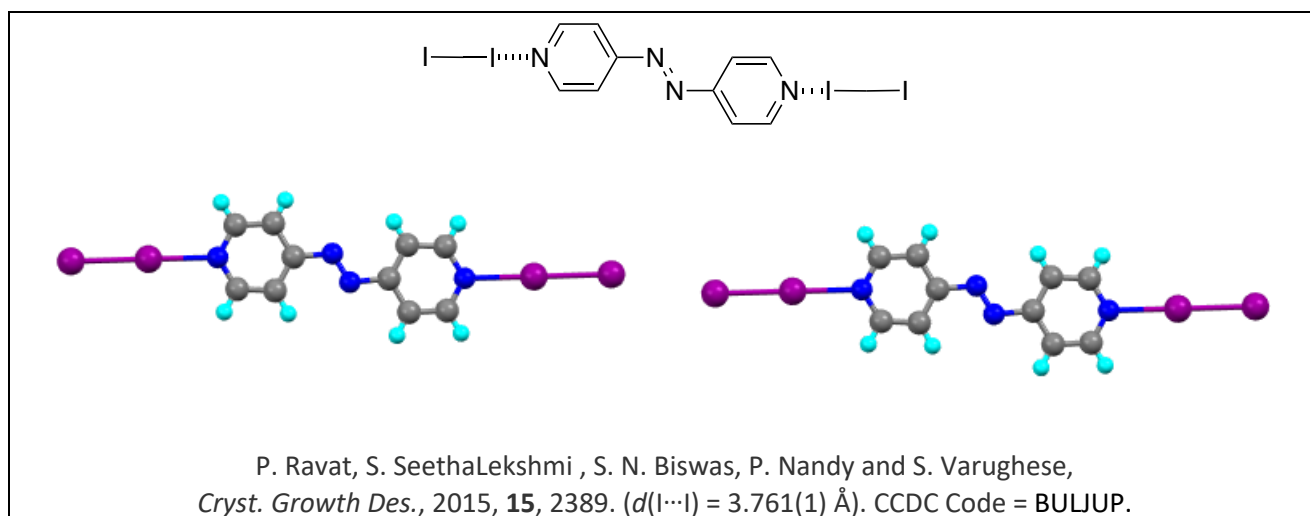

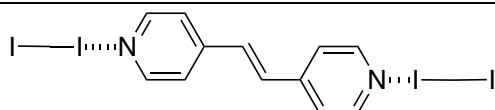

YIPKEG

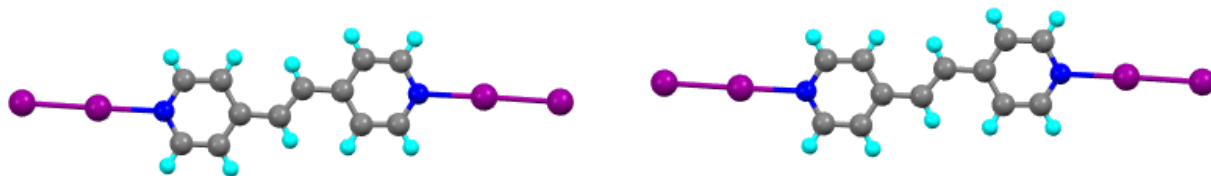

C. B. Aakeroy, J. Desper, B. A. Helfrich, P. Metrangolo, T. Pilati, G. Resnati and A. Stevenazzi, *Chem. Commun.*, 2007, 4236. ( $d(I \cdots I) = 3.8852(9) \text{ \AA}$ ). CCDC Code = YIPKEG.

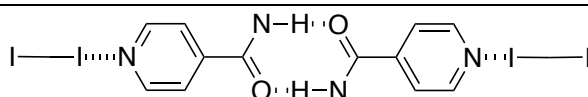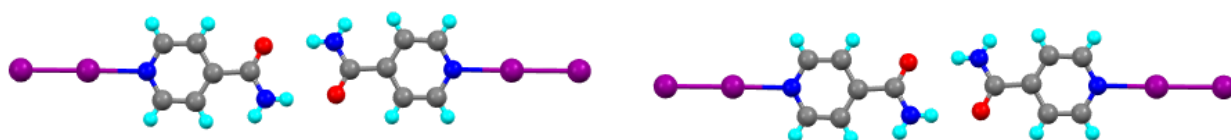

R. B. Walsh, C. W. Padgett, P. Metrangolo, G. Resnati, T. W. Hanks and W. T. Pennington, *Cryst. Growth Des.*, 2001, **1**, 165. ( $d(I \cdots I) = 3.6314(6) \text{ \AA}$ ). CCDC Code = QIHBOY.

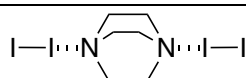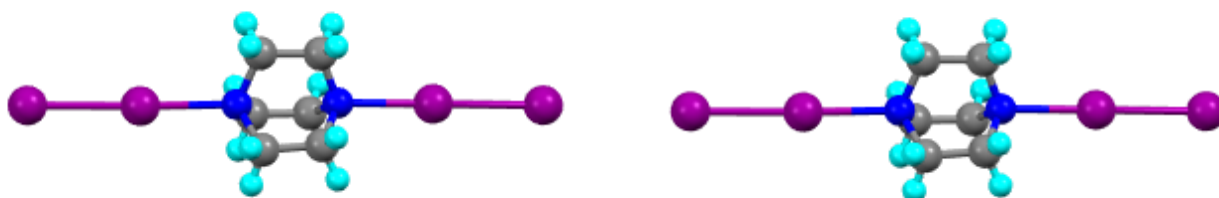

A. Peuronen, A. Valkonen, M. Kortelainen, K. Rissanen and M. Lahtinen, *Cryst. Growth Des.*, 2012, **12**, 4157. ( $d(I \cdots I) = 3.682(3) \text{ \AA}$ ). CCDC Code = HEKZOO.

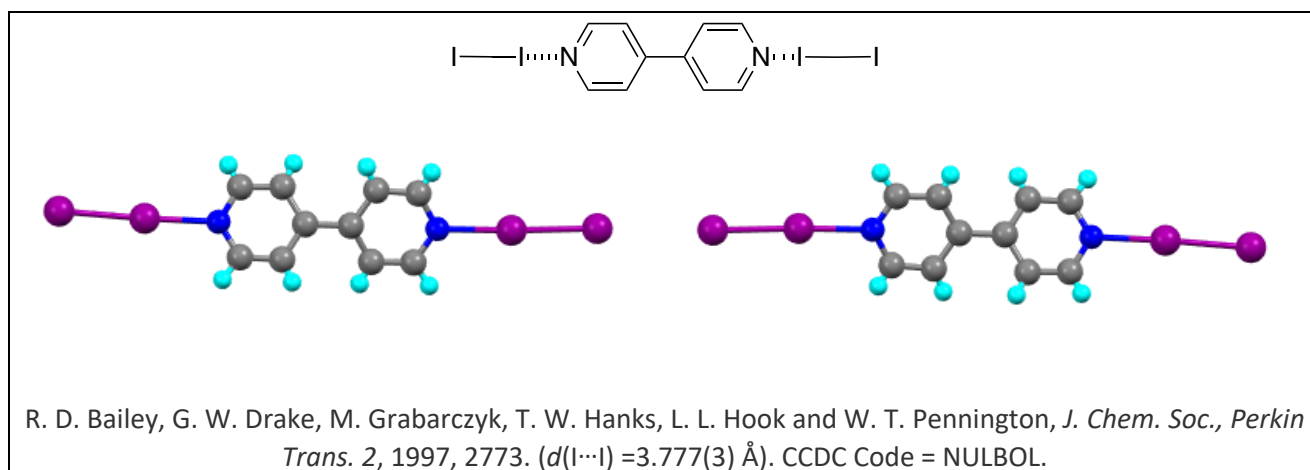

Figure S2 Crystal structures of the five complexes found in the CSD with a Type I I...I motif.

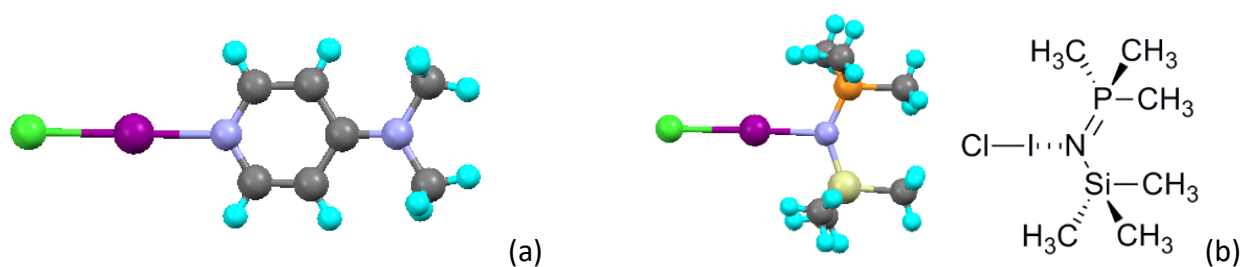

Figure S3 The molecular structures of complexes between ICl and a) DMAP and b) trimethylsilyl-trimethylphosphoranimine.

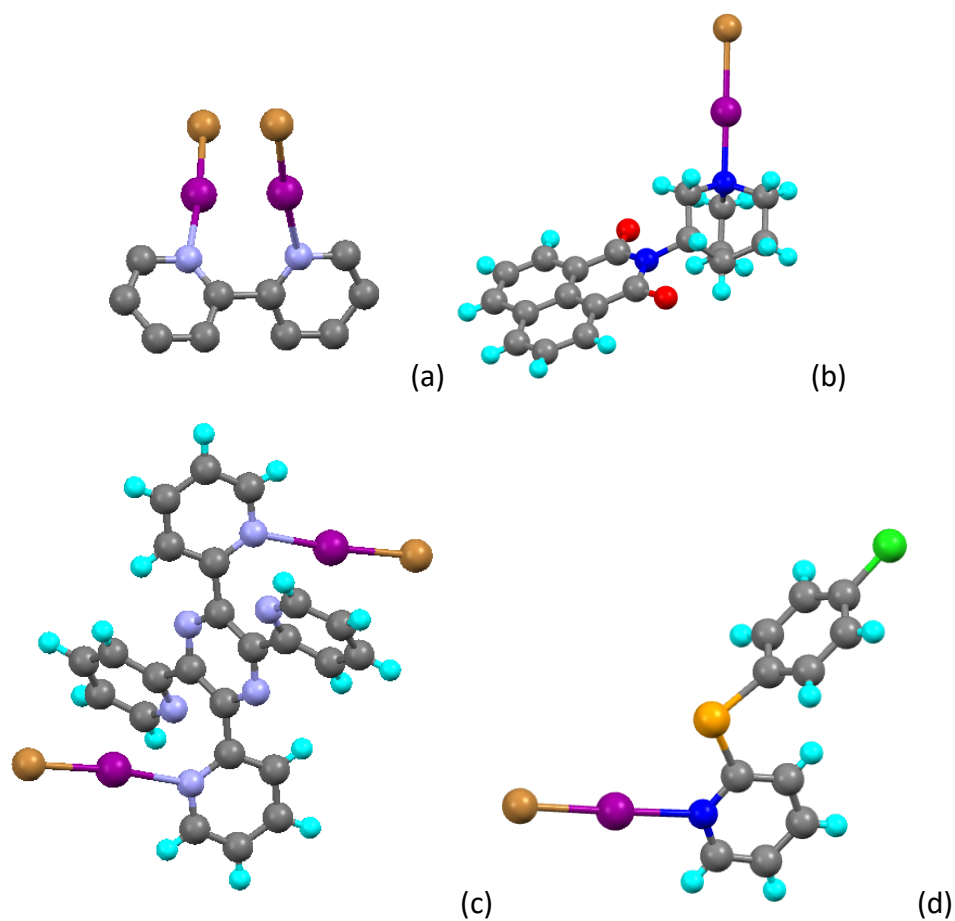

Figure S4 The molecular structures of complexes between IBr and a) 2,2'-bipyridine and b) a DABCO derivative (c) tetra-2-pyridyl-pyrazine and (d) a 2-(phenylseleno)pyridine. Hydrogen atoms in the structure with 2,2'-bipyridine have not been included.

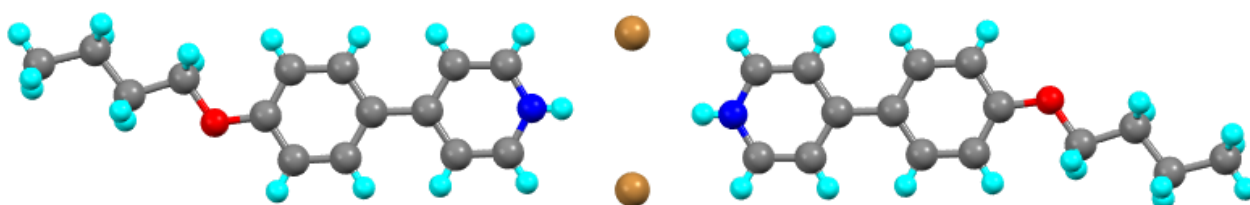

Figure S5 Hydrogen-bonded, dimeric arrangement for  $[4\text{-OPhPyH}]^+\text{Br}^-$

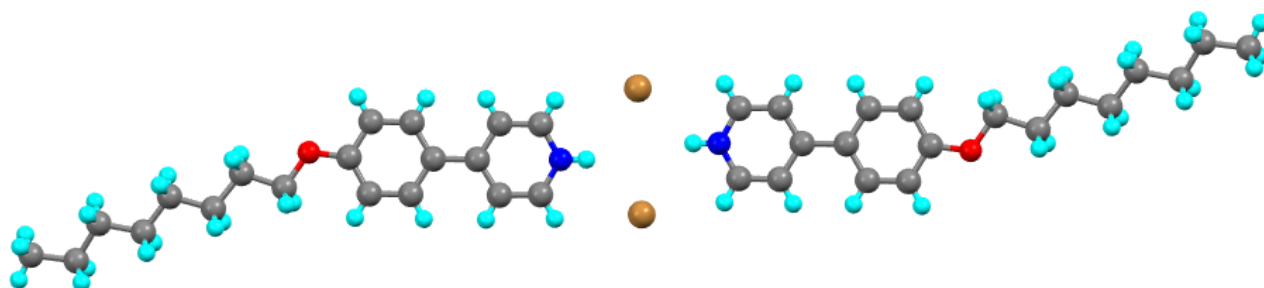

Figure S6 Hydrogen-bonded, dimeric arrangement for  $[8\text{-OPhPyH}]^+\text{Br}^-$

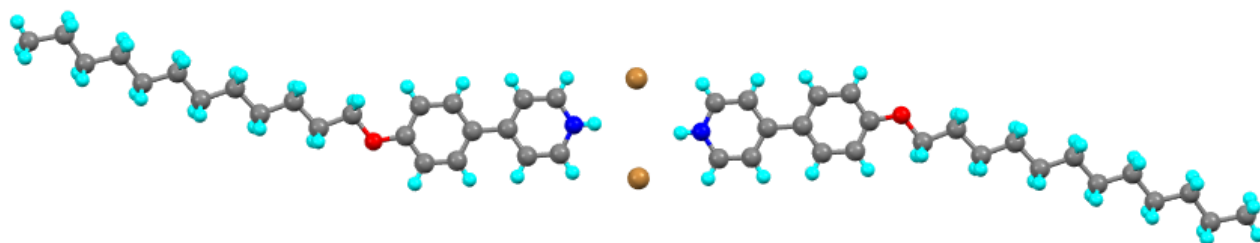

Figure S7 Hydrogen-bonded, dimeric arrangement for [12-OPhPyH]<sup>+</sup>Br<sup>-</sup>

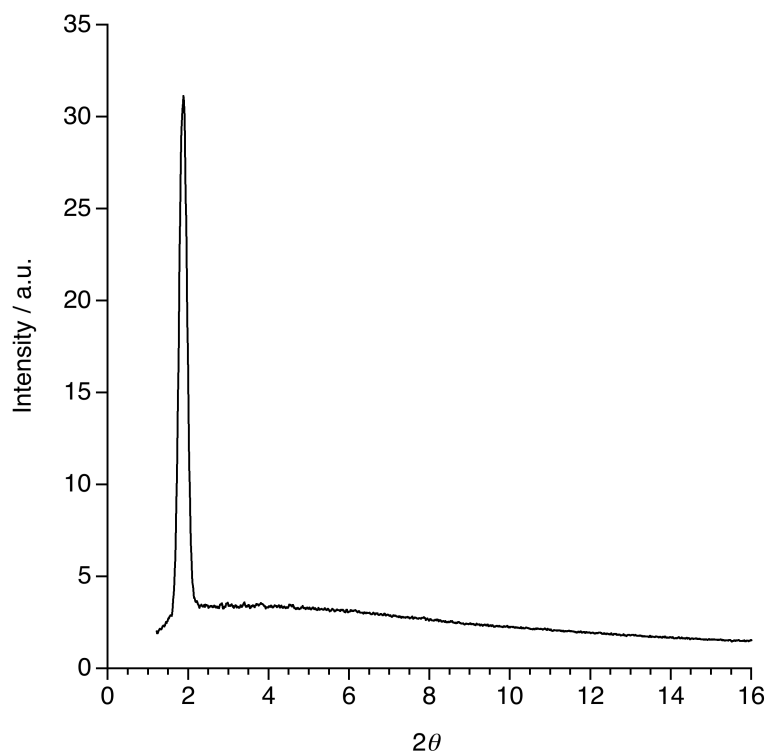

Figure S8 Small-angle diffraction pattern for 12-OPhPy...ICl at 135 °C.

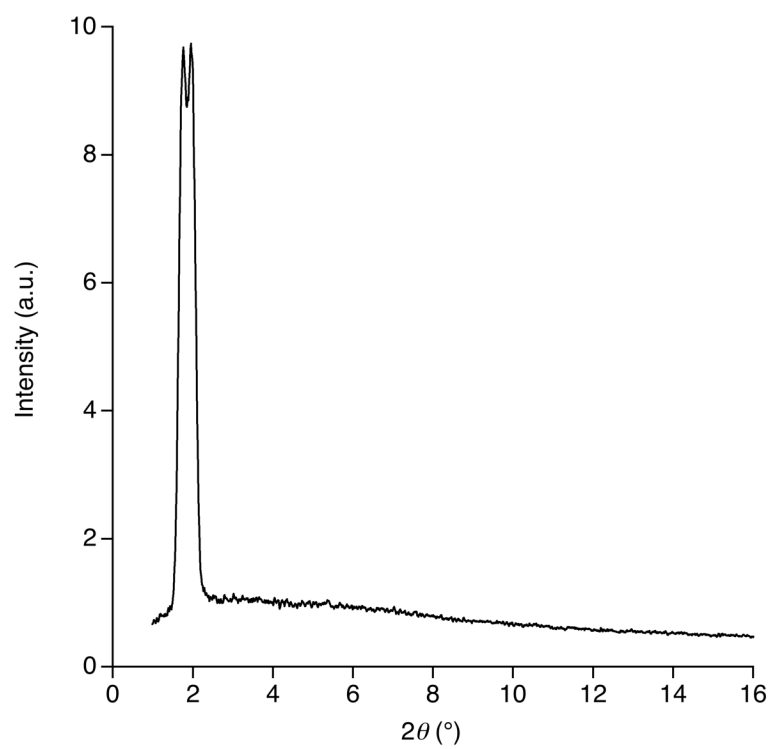

Figure S9 Small-angle diffraction pattern for 12-OPhPy...I<sub>2</sub> at 110 °C showing the two small-angle reflections.

## Experimental

**Table S1** Crystallographic parameters of (inter)halogen complexes.

|                                                              | <b>4-OPhPy...ICl</b>                                                | <b>4-OPhPy...I<sub>2</sub></b>                                      | <b>4-OPhPy...IBr</b>                                                |
|--------------------------------------------------------------|---------------------------------------------------------------------|---------------------------------------------------------------------|---------------------------------------------------------------------|
| CCDC Reference No.                                           | 2123967                                                             | 2123968                                                             | 2123969                                                             |
| Empirical formula                                            | C <sub>15</sub> H <sub>17</sub> NOICl                               | C <sub>15</sub> H <sub>17</sub> NOI <sub>2</sub>                    | C <sub>15</sub> H <sub>17</sub> NOIBr                               |
| Formula weight / g mol <sup>-1</sup>                         | 389.64                                                              | 481.09                                                              | 434.11                                                              |
| <i>T</i> / K                                                 | 110.05(10)                                                          | 110.05(10)                                                          | 110.05(10)                                                          |
| Wavelength (Å)                                               | 0.7107                                                              | 0.7107                                                              | 0.7107                                                              |
| Crystal system                                               | Triclinic                                                           | Triclinic                                                           | Triclinic                                                           |
| Space group                                                  | <i>P</i> $\bar{1}$                                                  | <i>P</i> $\bar{1}$                                                  | <i>P</i> $\bar{1}$                                                  |
| Colour                                                       | Colourless                                                          | Yellow                                                              | Colourless                                                          |
| Shape                                                        | Plate                                                               | Plate                                                               | Plate                                                               |
| Unit cell dimensions                                         |                                                                     |                                                                     |                                                                     |
| <i>a</i> / Å                                                 | 7.8428(3)                                                           | 8.7375(3)                                                           | 10.0323(4)                                                          |
| <i>b</i> / Å                                                 | 8.7456(4)                                                           | 9.2799(4)                                                           | 11.3017(4)                                                          |
| <i>c</i> / Å                                                 | 11.7865(6)                                                          | 10.6024(7)                                                          | 15.5236(5)                                                          |
| $\alpha$ / °                                                 | 81.274(4)                                                           | 106.226(5)                                                          | 106.418(3)                                                          |
| $\beta$ / °                                                  | 82.709(4)                                                           | 98.182(4)                                                           | 94.206(3)                                                           |
| $\gamma$ / °                                                 | 72.451(4)                                                           | 100.729(4)                                                          | 113.861(4)                                                          |
| Volume / Å <sup>3</sup>                                      | 757.89(6)                                                           | 793.61(7)                                                           | 1508.27(11)                                                         |
| <i>Z</i>                                                     | 2                                                                   | 2                                                                   | 4                                                                   |
| $\rho_{\text{calc}}$ / Mg m <sup>-3</sup>                    | 1.707                                                               | 2.013                                                               | 1.912                                                               |
| Absorption coefficient / mm <sup>-1</sup>                    | 2.281                                                               | 3.955                                                               | 4.764                                                               |
| <i>F</i> (000)                                               | 384                                                                 | 456                                                                 | 840                                                                 |
| Crystal size / mm <sup>3</sup>                               | 0.23 × 0.11 × 0.03                                                  | 0.23 × 0.11 × 0.01                                                  | 0.16 × 0.08 × 0.01                                                  |
| $\theta$ range for data collection                           | 2.84 to 28.16°                                                      | 2.95 to 28.11°                                                      | 2.80 to 28.03°                                                      |
| Index ranges                                                 | -10 ≤ <i>h</i> ≤ 10,<br>-11 ≤ <i>k</i> ≤ 11,<br>-15 ≤ <i>l</i> ≤ 14 | -11 ≤ <i>h</i> ≤ 10,<br>-12 ≤ <i>k</i> ≤ 11,<br>-13 ≤ <i>l</i> ≤ 13 | -13 ≤ <i>h</i> ≤ 12,<br>-10 ≤ <i>k</i> ≤ 14,<br>-20 ≤ <i>l</i> ≤ 20 |
| Reflections collected                                        | 8707                                                                | 9193                                                                | 11341                                                               |
| Independent reflections                                      | 3180                                                                | 3348                                                                | 6069                                                                |
|                                                              | <i>R</i> <sub>(int)</sub> = 0.0281                                  | <i>R</i> <sub>(int)</sub> = 0.0264                                  | <i>R</i> <sub>(int)</sub> = 0.0274                                  |
| Completeness                                                 | 99.8%                                                               | 99.8%                                                               | 99.7%                                                               |
|                                                              | to $\theta$ = 25.24°                                                | to $\theta$ = 25.24°                                                | to $\theta$ = 25.21°                                                |
| Max. and min. transmission                                   | 0.936 and 0.744                                                     | 0.944 and 0.664                                                     | 0.933 and 0.620                                                     |
| Data/restraints/parameters                                   | 3180 / 0 / 173                                                      | 3348 / 20 / 208                                                     | 6069 / 0 / 345                                                      |
| Goodness-of-fit on <i>F</i> <sup>2</sup>                     | 1.041                                                               | 1.087                                                               | 1.046                                                               |
| Final <i>R</i> indices [ <i>I</i> > 2 $\sigma$ ( <i>I</i> )] | <i>R</i> <sub>1</sub> = 0.0235<br><i>wR</i> <sub>2</sub> = 0.0434   | <i>R</i> <sub>1</sub> = 0.0242<br><i>wR</i> <sub>2</sub> = 0.0489   | <i>R</i> <sub>1</sub> = 0.0285<br><i>wR</i> <sub>2</sub> = 0.0481   |
| <i>R</i> indices (all data)                                  | <i>R</i> <sub>1</sub> = 0.0280<br><i>wR</i> <sub>2</sub> = 0.0456   | <i>R</i> <sub>1</sub> = 0.0355<br><i>wR</i> <sub>2</sub> = 0.0429   | <i>R</i> <sub>1</sub> = 0.0395<br><i>wR</i> <sub>2</sub> = 0.0517   |
| Largest diff. peak and hole                                  | 0.45 and -0.46                                                      | 0.69 and -0.68                                                      | 0.59 and -0.58                                                      |



**Table S2** Crystallographic parameters of alkoxyphenylpyridinium salts.

|                                                              | [10-OPhPyH]Br <sub>3</sub>                                           | [12-OPhPyH] <sub>2</sub> Br <sub>3</sub>                                      | [4-OPhPyH]Br                                                         | [6-OPhPyH]Br                                                          | [8-OPhPyH]Br                                                         | [12-OPhPyH]Br                                                      |
|--------------------------------------------------------------|----------------------------------------------------------------------|-------------------------------------------------------------------------------|----------------------------------------------------------------------|-----------------------------------------------------------------------|----------------------------------------------------------------------|--------------------------------------------------------------------|
| CCDC Reference No.                                           | 2123970                                                              | 2123971                                                                       | 2123972                                                              | 2123966                                                               | 2123973                                                              | 2123974                                                            |
| Empirical formula                                            | C <sub>21</sub> H <sub>30</sub> Br <sub>3</sub> NO                   | C <sub>46</sub> H <sub>67</sub> Br <sub>3</sub> N <sub>2</sub> O <sub>2</sub> | C <sub>15</sub> H <sub>18</sub> BrNO                                 | C <sub>17</sub> H <sub>22</sub> NOBr                                  | C <sub>19</sub> H <sub>26</sub> BrNO                                 | C <sub>23</sub> H <sub>34</sub> BrNO                               |
| Formula weight / g mol <sup>-1</sup>                         | 552.19                                                               | 919.75                                                                        | 308.21                                                               | 336.26                                                                | 364.32                                                               | 420.42                                                             |
| T / K                                                        | 110.05(10)                                                           | 110.05(10)                                                                    | 110.05(10)                                                           | 110.05(10)                                                            | 110.05(10)                                                           | 110.05(10)                                                         |
| Wavelength (Å)                                               | 0.7107                                                               | 0.7107                                                                        | 0.7107                                                               | 0.7107                                                                | 0.7107                                                               | 0.7107                                                             |
| Crystal system                                               | monoclinic                                                           | monoclinic                                                                    | triclinic                                                            | Triclinic                                                             | triclinic                                                            | triclinic                                                          |
| Space group                                                  | <i>P</i> 2 <sub>1</sub> / <i>c</i>                                   | <i>P</i> 2 <sub>1</sub> / <i>c</i>                                            | <i>P</i> $\bar{1}$                                                   | <i>P</i> $\bar{1}$                                                    | <i>P</i> $\bar{1}$                                                   | <i>P</i> $\bar{1}$                                                 |
| Colour                                                       | Yellow                                                               | Yellow                                                                        | light yellow                                                         | Yellow                                                                | colourless                                                           | yellow                                                             |
| Shape                                                        | Irregular                                                            | Irregular                                                                     | plate                                                                | Plate                                                                 | plate                                                                | needle                                                             |
| Unit cell dimensions <i>a</i> / Å                            | 4.63873(14)                                                          | 28.1904(12)                                                                   | 6.6716(3)                                                            | 6.7843(3)                                                             | 6.7554(3)                                                            | 6.7504(3)                                                          |
| <i>b</i> / Å                                                 | 56.6665(12)                                                          | 9.1296(2)                                                                     | 8.3651(4)                                                            | 8.3585(3)                                                             | 8.4116(3)                                                            | 8.3652(4)                                                          |
| <i>c</i> / Å                                                 | 8.4248(2)                                                            | 17.0705(6)                                                                    | 13.0803(6)                                                           | 15.1607(7)                                                            | 16.8284(7)                                                           | 20.1363(10)                                                        |
| $\alpha$ / °                                                 | 90.00                                                                | 90.00                                                                         | 86.724(4)                                                            | 97.295(3)                                                             | 97.564(3)                                                            | 81.710(4)                                                          |
| $\beta$ / °                                                  | 95.637(2)                                                            | 98.313(4)                                                                     | 86.237(4)                                                            | 93.314(4)                                                             | 96.503(4)                                                            | 86.632(4)                                                          |
| $\gamma$ / °                                                 | 90.00                                                                | 90.00                                                                         | 70.833(4)                                                            | 111.978(4)                                                            | 110.294(4)                                                           | 70.675(4)                                                          |
| Volume / Å <sup>3</sup>                                      | 2203.83(10)                                                          | 4347.2(3)                                                                     | 687.56(6)                                                            | 785.58(6)                                                             | 876.00(6)                                                            | 1061.71(9)                                                         |
| Z                                                            | 4                                                                    | 4                                                                             | 2                                                                    | 2                                                                     | 2                                                                    | 2                                                                  |
| $\rho_{\text{calc}}$ / Mg m <sup>-3</sup>                    | 1.664                                                                | 1.405                                                                         | 1.489                                                                | 1.422                                                                 | 1.381                                                                | 1.315                                                              |
| Absorption coefficient / mm <sup>-1</sup>                    | 5.502                                                                | 2.822                                                                         | 2.977                                                                | 2.612                                                                 | 2.349                                                                | 1.947                                                              |
| <i>F</i> (000)                                               | 1104.0                                                               | 1912.0                                                                        | 316.0                                                                | 348                                                                   | 380.0                                                                | 444.0                                                              |
| Crystal size / mm <sup>3</sup>                               | 0.3087 × 0.1563 ×<br>0.1294                                          | 0.227 × 0.157 ×<br>0.046                                                      | 0.278 × 0.077 ×<br>0.031                                             | 0.3226 × 0.1893 ×<br>0.0387                                           | 0.303 × 0.169 ×<br>0.034                                             | 0.2183 × 0.0703 ×<br>0.0616                                        |
| $\theta$ range for data collection                           | 3.02 to 30.03°                                                       | 2.84 to 25.09°                                                                | 2.96 to 30.03°                                                       | 3.18 to 30.05°                                                        | 3.1 to 30.08°                                                        | 2.92 to 29.32°                                                     |
| Index ranges                                                 | -6 ≤ <i>h</i> ≤ 6,<br>-79 ≤ <i>k</i> ≤ 59,<br>-6 ≤ <i>l</i> ≤ 11     | -21 ≤ <i>h</i> ≤ 33,<br>-10 ≤ <i>k</i> ≤ 8,<br>-20 ≤ <i>l</i> ≤ 19            | -9 ≤ <i>h</i> ≤ 9,<br>-11 ≤ <i>k</i> ≤ 7,<br>-18 ≤ <i>l</i> ≤ 16     | -9 ≤ <i>h</i> ≤ 7,<br>-11 ≤ <i>k</i> ≤ 11,<br>-18 ≤ <i>l</i> ≤ 21     | -6 ≤ <i>h</i> ≤ 9,<br>-10 ≤ <i>k</i> ≤ 11,<br>-23 ≤ <i>l</i> ≤ 23    | -9 ≤ <i>h</i> ≤ 8,<br>-10 ≤ <i>k</i> ≤ 11,<br>-15 ≤ <i>l</i> ≤ 27  |
| Reflections collected                                        | 10718                                                                | 15250                                                                         | 6296                                                                 | 6843                                                                  | 7701                                                                 | 7571                                                               |
| Independent reflections                                      | 6356                                                                 | 7698                                                                          | 4001                                                                 | 4465                                                                  | 5098                                                                 | 4902                                                               |
| Completeness                                                 | [ <i>R</i> <sub>int</sub> = 0.0302]<br>98.9%<br>to $\theta$ = 25.24° | [ <i>R</i> <sub>int</sub> = 0.0257]<br>99.7%<br>to $\theta$ = 25.09°          | [ <i>R</i> <sub>int</sub> = 0.0273]<br>99.3%<br>to $\theta$ = 26.00° | [ <i>R</i> <sub>int</sub> = 0.0256]<br>97.10%<br>to $\theta$ = 25.24° | [ <i>R</i> <sub>int</sub> = 0.0245]<br>99.2%<br>to $\theta$ = 26.00° | [ <i>R</i> <sub>int</sub> = 0.0256]<br>99.2<br>to $\theta$ = 25.0° |
| Max. and min. transmission                                   | 0.567 and 0.365                                                      | 0.883 and 0.657                                                               | 0.912 and 0.724                                                      | 0.906 and 0.486                                                       | 0.924 and 0.591                                                      | 0.942 and 0.869                                                    |
| Data/restraints/parameters                                   | 6356/0/240                                                           | 7698/0/481                                                                    | 4001/0/168                                                           | 4465 / 0 / 186                                                        | 5098/0/204                                                           | 4902/0/240                                                         |
| Goodness-of-fit on <i>F</i> <sup>2</sup>                     | 1.190                                                                | 1.053                                                                         | 1.063                                                                | 1.076                                                                 | 1.051                                                                | 1.059                                                              |
| Final <i>R</i> indices [ <i>I</i> > 2 $\sigma$ ( <i>I</i> )] | <i>R</i> <sub>1</sub> = 0.0586,<br><i>wR</i> <sub>2</sub> = 0.0960   | <i>R</i> <sub>1</sub> = 0.0393,<br><i>wR</i> <sub>2</sub> = 0.0798            | <i>R</i> <sub>1</sub> = 0.0373,<br><i>wR</i> <sub>2</sub> = 0.0735   | <i>R</i> <sub>1</sub> = 0.0367,<br><i>wR</i> <sub>2</sub> = 0.0832    | <i>R</i> <sub>1</sub> = 0.0353,<br><i>wR</i> <sub>2</sub> = 0.0728   | <i>R</i> <sub>1</sub> = 0.0351,<br><i>wR</i> <sub>2</sub> = 0.0744 |
| <i>R</i> indices (all data)                                  | <i>R</i> <sub>1</sub> = 0.0742,<br><i>wR</i> <sub>2</sub> = 0.1021   | <i>R</i> <sub>1</sub> = 0.0715,<br><i>wR</i> <sub>2</sub> = 0.0919            | <i>R</i> <sub>1</sub> = 0.0458,<br><i>wR</i> <sub>2</sub> = 0.0779   | <i>R</i> <sub>1</sub> = 0.0460 <i>wR</i> <sub>2</sub> =<br>0.0890     | <i>R</i> <sub>1</sub> = 0.0453,<br><i>wR</i> <sub>2</sub> = 0.0772   | <i>R</i> <sub>1</sub> = 0.0439,<br><i>wR</i> <sub>2</sub> = 0.0787 |
| Largest diff. peak and hole                                  | 0.68 and<br>-1.87                                                    | 0.63 and<br>-0.44                                                             | 0.71/-0.68                                                           | 0.80 and -1.18                                                        | 0.52/-0.34                                                           | 0.53/-0.32                                                         |

## Instrumentation

NMR spectra were obtained using either a Jeol ECS400 400 MHz, which operates at 400 MHz for  $^1\text{H}$  spectroscopy or a Bruker AV500 500 MHz spectrometer, which operates at 500 MHz for  $^1\text{H}$  spectroscopy. All spectra were obtained at ambient temperature using  $\text{CDCl}_3$  as the solvent and as the internal standard for  $^1\text{H}$  and  $^{13}\text{C}$  spectra. All chemical shifts are given in ppm.

Single crystal X-ray diffraction data were collected at 110 K on a Bruker Smart Apex diffractometer with  $\text{MoK}\alpha$  radiation ( $\lambda = 0.71073 \text{ \AA}$ ) using a SMART CCD camera.

Small angle X-ray scattering was performed using a Bruker D8 Discover equipped with a bespoke temperature-controlled, bored graphite rod furnace, custom built at the University of York. The radiation used was copper  $\text{K}\alpha$  ( $\lambda = 0.154056 \text{ nm}$ ) from a  $1 \mu\text{S}$  microfocus source. Diffraction patterns were recorded on a  $2048 \times 2048$  pixel Bruker VANTEC 500 area detector set at a distance of 121 mm from the sample. Samples were filled into 0.9 mm capillary tubes.

Optical microscopy was performed using an Olympus BX50 microscope at X100 magnification. Temperature was controlled using a Linkam Scientific LTS 350 heating stage.

## General Procedure for the Preparation of 4-Alkoxybromobenzene

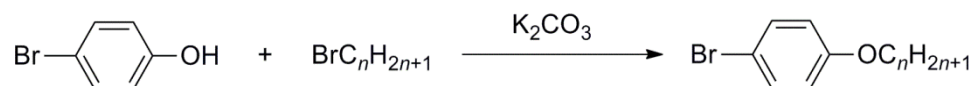

4-Bromophenol (3.46 g, 20 mmol) and potassium carbonate (13.82 g, 100 mmol) were added to acetone ( $160 \text{ cm}^3$ ) in a round-bottomed flask and the mixture was stirred for 10 min. A flow of nitrogen was passed through the equipment. The flask was heated under reflux at  $60 \text{ }^\circ\text{C}$ . Once reflux was achieved 1-bromoalkane (26 mmol) was added dropwise to the flask. The reaction mixture was heated under reflux for 16 h whilst stirring. The mixture was filtered and the filtrate

was concentrated *in vacuo*. The crude product was purified by column chromatography on silica gel eluted with 100:1 petroleum ether (40 – 60 °C): acetone.

#### 4-Hexyloxybromobenzene

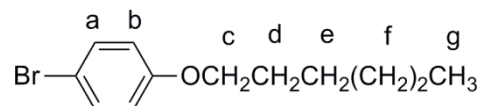

Yield: 71%.  $^1\text{H}$  NMR (400 MHz,  $\text{CDCl}_3$ ):  $\delta$  = 7.35 (2H, Ha, AA'XX',  $J$  = 9.0 Hz), 6.77 (2H, Hb, AA'XX',  $J$  = 8.9 Hz), 3.91 (2H, Hc, t,  $J$  = 6.6 Hz), 1.76 (2H, Hd, m), 1.44 (2H, He, m), 1.33 (4H, Hf, m), 0.90 (3H, Hg, t,  $J$  = 7.1 Hz).

$^{13}\text{C}\{^1\text{H}\}$  NMR (100 MHz,  $\text{CDCl}_3$ ):  $\delta$  = 158.07, 132.00, 116.11, 112.36, 68.08, 31.39, 28.96, 25.50, 22.42, 13.86. Spectra for other homologues are essentially the same with a different integration in the  $^1\text{H}$  NMR spectra for the peak at  $\delta$  = 1.33 ppm and additional peaks in the high field region of the  $^{13}\text{C}$  NMR spectra corresponding to the alkyl chain.

#### General Procedure for the Synthesis of 4-Alkoxyphenylpyridines (*n*-OPhPy)

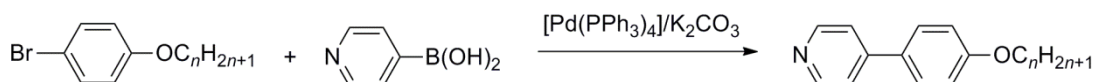

Potassium carbonate (7.7 g, 56 mmol) was dissolved in a mixture of water (20  $\text{cm}^3$ ) and THF (40  $\text{cm}^3$ ). This solution was added to 4-alkoxybromobenzene (14 mmol) in a round-bottomed flask under nitrogen. Tetrakis(triphenylphosphine)palladium(0) (0.485 g, 0.42 mmol) was added to the flask, which was then heated to 60 °C. A suspension of 4-pyridineboronic acid (2.46 g, 20 mmol) in THF (40  $\text{cm}^3$ ) was added to the flask and the reaction mixture heated under reflux at 80 °C whilst stirring for 16 hours. The mixture was extracted with diethyl ether (100  $\text{cm}^3$ ) and washed with NaOH solution (10% w/v, 50  $\text{cm}^3$ ) and water (100  $\text{cm}^3$ ). The organic layer was dried over anhydrous magnesium sulfate and, after filtration, the solvent was removed using a rotary evaporator. The crude product was purified by column chromatography on silica gel, eluting with 1:1 petroleum ether (40 – 60 °C): acetone (1% triethylamine). The product was crystallised from hot petroleum ether (40 – 60 °C) to give a colourless solid.

#### 4-Hexyloxyphenylpyridine (6-OPhPy)

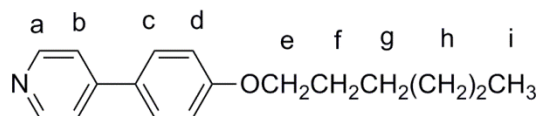

Yield: 28%.  $^1\text{H}$  NMR (400 MHz,  $\text{CDCl}_3$ ):  $\delta$  = 8.61 (2H, Ha, AA'XX',  $J$  = 6.2 Hz), 7.59 (2H, Hc, AA'XX',  $J$  = 8.8 Hz), 7.47 (2H, Hb, AA'XX',  $J$  = 6.2 Hz), 7.00 (2H, Hd, AA'XX',  $J$  = 8.8 Hz), 4.01 (2H, He, t,  $J$  = 6.6 Hz), 1.81 (2H, Hf, m), 1.48 (2H, Hg, m), 1.35 (4H, Hh, m), 0.91 (3H, Hi, t,  $J$  = 7.0 Hz).

$^{13}\text{C}\{^1\text{H}\}$  NMR (100 MHz,  $\text{CDCl}_3$ ):  $\delta$  = 159.96, 150.02, 147.68, 129.92, 127.93, 120.85, 114.90, 68.00, 31.41, 29.02, 25.55, 22.44, 13.88. Spectra of other homologues are essentially identical with different integration for the peak at  $\delta$  = 1.35 ppm in the  $^1\text{H}$  NMR spectra and additional peaks in the high field region of the  $^{13}\text{C}$  NMR spectra corresponding to atoms in the alkoxy chain.

Table S3 Yields and elemental analysis of alkoxyphenylpyridines (*n*-OPhPy)

| Complex  | Yield / % | Anal. Calcd. / % |     |     | Found / % |     |     |
|----------|-----------|------------------|-----|-----|-----------|-----|-----|
|          |           | C                | H   | N   | C         | H   | N   |
| 4-OPhPy  | 23        | 79.3             | 7.5 | 6.2 | 78.9      | 7.5 | 6.0 |
| 6-OPhPy  | 28        | 80.0             | 8.3 | 5.5 | 79.0      | 8.2 | 5.4 |
| 8-OPhPy  | 24        | 80.5             | 8.9 | 4.9 | 79.5      | 8.9 | 4.7 |
| 10-OPhPy | 52        | 81.0             | 9.4 | 4.5 | 80.6      | 9.4 | 4.5 |
| 12-OPhPy | 59        | 81.4             | 9.8 | 4.1 | 81.3      | 9.8 | 4.0 |

#### Halogen-Bonded Complexes between 4-Dodecyloxyphenylpyridine and Bromine

Bromine (0.0064  $\text{cm}^3$ , 0.125 mmol) was added to a solution of 4-decyloxyphenylpyridine (0.0425 g, 0.125 mmol) in hexane (20  $\text{cm}^3$ ) in a round-bottomed flask. The reaction mixture was stirred at room temperature for 2 h. The precipitate was filtered, washed with hexane and dried under vacuum.

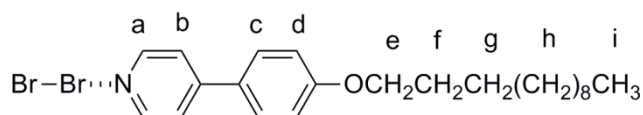

Yield: 52%

$^1\text{H}$  NMR ( $\text{CDCl}_3$ , 400 MHz):  $\delta$  = 8.55 (2H, Ha, AA'XX',  $J$  = 4.3 Hz), 7.61 (2H, Hc, AA'XX',  $J$  = 8.8 Hz), 7.56 (2H, Hb, AA'XX',  $J$  = 5.0 Hz), 7.01 (2H, Hd, AA'XX',  $J$  = 8.8 Hz), 4.02 (2H, He, t,  $J$  = 6.6 Hz), 1.81 (2H, Hf, m), 1.47 (2H, Hg, m), 1.26 (16H, Hh, m), 0.88 (3H, Hi, t,  $J$  = 6.8 Hz).

$^{13}\text{C}\{^1\text{H}\}$  NMR ( $\text{CDCl}_3$ , 100 MHz):  $\delta$  = 193.72, 164.45, 128.71, 115.63, 104.60, 101.22, 99.23, 68.58, 40.77, 32.22, 29.96, 29.94, 29.87, 29.68, 29.66, 29.46, 26.31, 23.00, 14.44.

Anal. Calcd. For  $\text{C}_{23}\text{H}_{33}\text{NOBr}_2$ : C, 55.3; H, 6.7; N, 2.8%. Found: C, 55.5; H, 6.7; N, 2.8%.

### Halogen-Bonded Complexes between 4-Alkoxyphenylpyridines and Iodine

Iodine (0.0635 g, 0.25 mmol) in hexane (5  $\text{cm}^3$ ) was added to a solution of 4-alkoxyphenylpyridine (0.25 mmol) in chloroform (5  $\text{cm}^3$ ) in a round-bottomed flask. The reaction mixture was stirred at room temperature for 2 h. The precipitate was filtered, washed with hexane and dried under vacuum.

#### Iodine...4-Decyloxyphenylpyridine

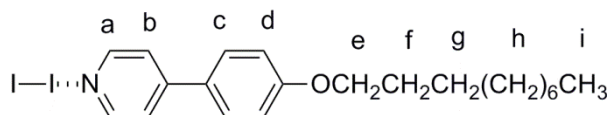

Yield: 30%.  $^1\text{H}$  NMR (400 MHz,  $\text{CDCl}_3$ ):  $\delta$  = 8.57 (2H, Ha, AA'XX',  $J$  = 5.8 Hz), 7.59 (2H, Hc, AA'XX',  $J$  = 8.8 Hz), 7.49 (2H, Hb, AA'XX',  $J$  = 6.2 Hz), 7.00 (2H, Hd, AA'XX',  $J$  = 8.9 Hz), 4.01 (2H, He, t,  $J$  = 6.6 Hz), 1.81 (2H, Hf, m), 1.47 (2H, Hg, m), 1.28 (12H, Hh, m), 0.88 (3H, Hi, t,  $J$  = 6.8 Hz). Spectra for other homologues were effectively identical save for the integration of the signal at  $\delta$  = 1.28.

Table S4 Yields and elemental analysis for complexes of iodine with alkoxyphenylpyridines (7-*n*).

| Complex                   | Yield / % | Anal. Calcd. / % |     |     | Found / % |     |     |
|---------------------------|-----------|------------------|-----|-----|-----------|-----|-----|
|                           |           | C                | H   | N   | C         | H   | N   |
| 4-OPhPy...I <sub>2</sub>  | 29        | 37.5             | 3.6 | 2.9 | 37.8      | 3.5 | 2.9 |
| 6-OPhPy...I <sub>2</sub>  | 46        | 40.1             | 4.2 | 2.8 | 39.8      | 4.3 | 2.8 |
| 8-OPhPy...I <sub>2</sub>  | 45        | 42.5             | 4.7 | 2.6 | 42.8      | 4.7 | 2.6 |
| 10-OPhPy...I <sub>2</sub> | 30        | 44.6             | 5.2 | 2.5 | 44.0      | 5.1 | 2.4 |
| 12-OPhPy...I <sub>2</sub> | 24        | 46.6             | 5.6 | 2.4 | 46.4      | 5.5 | 2.3 |

### Halogen-Bonded Complexes between Alkoxyphenylpyridines and Iodine Monochloride

Iodine monochloride (25  $\mu$ L, 0.5 mmol) in dry hexane (5 cm<sup>3</sup>) was added to a solution of alkoxyphenylpyridine (0.5 mmol) in chloroform (5 cm<sup>3</sup>) in a round-bottomed flask under a nitrogen atmosphere. The mixture was stirred at room temperature for 2 h. The precipitate was filtered, washed with dry hexane and dried under vacuum.

#### Iodine Monochloride...4-Hexyloxyphenylpyridine

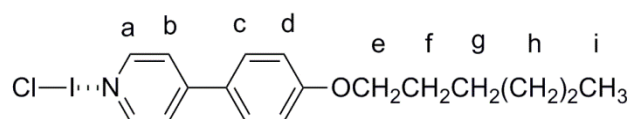

Yield: 79%. <sup>1</sup>H NMR (CDCl<sub>3</sub>, 400 MHz):  $\delta$  = 8.57 (2H, Ha, AA'XX', *J* = 5.0 Hz), 7.59 (2H, Hc, AA'XX', *J* = 8.8 Hz), 7.56 (2H, Hb, AA'XX', *J* = 5.8 Hz), 7.01 (2H, Hd, AA'XX', *J* = 8.8 Hz), 4.01 (2H, He, t, *J* = 6.6 Hz), 1.80 (2H, Hf, m), 1.46 (2H, Hg, m), 1.34 (4H, Hh, m), 0.90 (3H, Hi, t, *J* = 7.1 Hz).

<sup>13</sup>C{<sup>1</sup>H} NMR (CDCl<sub>3</sub>, 100 MHz):  $\delta$  = 161.52, 148.28, 128.50, 123.22, 115.51, 100.89, 98.91, 68.34, 31.52, 29.06, 25.65, 22.58, 14.02. Spectra of other homologues are essentially identical with different integration of the peak at  $\delta$  = 1.34 ppm in the <sup>1</sup>H NMR spectra and additional peaks in the high field region of the <sup>13</sup>C NMR spectra corresponding to carbons in the alkoxy chain. Table shows the yields and results of elemental analysis for these complexes.

Table S5 Yields and elemental analysis for complexes of iodine monochloride with 4-alkoxyphenylpyridines (8-*n*).

| Complex      | Yield<br>/ % | Anal. Calcd. / % |     |     | Found / % |     |     |
|--------------|--------------|------------------|-----|-----|-----------|-----|-----|
|              |              | C                | H   | N   | C         | H   | N   |
| 4-OPhPy...I  | 66           | 46.2             | 4.4 | 3.6 | 45.7      | 4.3 | 3.5 |
| 6-OPhPy...I  | 79           | 48.9             | 5.1 | 3.4 | 48.6      | 4.9 | 3.2 |
| 8-OPhPy...I  | 56           | 51.2             | 5.7 | 3.1 | 51.1      | 5.6 | 3.1 |
| 10-OPhPy...I | 64           | 53.2             | 6.2 | 3.0 | 52.9      | 6.0 | 2.8 |
| 12-OPhPy...I | 57           | 55.0             | 6.6 | 2.8 | 54.4      | 6.6 | 2.8 |

### Halogen bonded complexes between 4-alkoxyphenylpyridines and iodine monobromide

Iodine monobromide (0.1034 g, 0.5 mmol) in dry hexane (5 cm<sup>3</sup>) was added to a solution of 4-alkoxyphenylpyridine (0.5 mmol) in chloroform (5 cm<sup>3</sup>) in a round-bottomed flask under a nitrogen atmosphere. The reaction mixture was stirred at room temperature for 2 h. The precipitate was filtered, washed with dry hexane and dried under vacuum.

#### Iodine Monobromide...4-Hexyloxyphenylpyridine

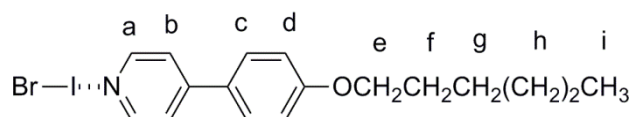

Yield: 64%. <sup>1</sup>H NMR (400 MHz, CDCl<sub>3</sub>): δ = 8.56 (2H, Ha, AA'XX', J = 6.5 Hz), 7.60 (2H, Hc, AA'XX', J = 8.8 Hz), 7.56 (2H, Hb, AA'XX', J = 6.5 Hz), 7.02 (2H, Hd, AA'XX', J = 8.8 Hz), 4.02 (2H, He, t, J = 6.6 Hz), 1.81 (2H, Hf, m), 1.48 (2H, Hg, m), 1.35 (4H, Hh, m), 0.91 (3H, Hi, t, J = 7.1 Hz).

<sup>13</sup>C {<sup>1</sup>H} NMR (100 MHz, CDCl<sub>3</sub>): δ = 161.35, 151.31, 147.93, 128.44, 123.07, 115.46, 106.05, 68.31, 31.52, 29.07, 25.65, 22.57, 14.02. Spectra for other homologues were essentially identical with different integration of the peak at δ = 1.35 ppm in the <sup>1</sup>H NMR spectra and additional peaks in the high field region of the <sup>13</sup>C NMR spectra corresponding to carbon atoms in the alkoxy chain.

Table S6 Yields and elemental analysis for complexes of iodine monobromide with 4-alkoxyphenylpyridine.

| Complex        | Yield / % | Anal. Calcd. / % |     |     | Found / % |     |     |
|----------------|-----------|------------------|-----|-----|-----------|-----|-----|
|                |           | C                | H   | N   | C         | H   | N   |
| 4-OPhPy...IBr  | 58        | 41.5             | 4.0 | 3.2 | 41.1      | 3.9 | 3.2 |
| 6-OPhPy...IBr  | 64        | 44.2             | 4.6 | 3.0 | 43.8      | 4.5 | 2.9 |
| 8-OPhPy...IBr  | 63        | 46.6             | 5.1 | 2.9 | 46.2      | 4.9 | 2.5 |
| 10-OPhPy...IBr | 76        | 48.7             | 5.6 | 2.7 | 48.2      | 5.5 | 2.6 |
| 12-OPhPy...IBr | 74        | 50.6             | 6.1 | 2.6 | 50.4      | 5.8 | 2.4 |

### Computational Details

All calculations reported in this paper were carried out using GAUSSIAN.<sup>S1</sup> The geometries of the monomers and complexes between I<sub>2</sub>, ICl, IBr and Br<sub>2</sub> and methoxyphenylpyridine were optimised at the MP2 and M06-2X levels of theory. The geometries of the complexes between I<sub>2</sub>, ICl, IBr and Br<sub>2</sub> and pyridine were optimised at the M06-2X level of theory. For iodine, in all calculations use was made of the aug-cc-pVDZ-PP basis set with effective core potentials (ECPs). In the M06-2X calculations all other atoms were assigned aug-cc-pVDZ basis sets. To reduce computational effort without a significant decrease in accuracy, in the MP2 calculations aug-cc-pVDZ basis sets were used for the dihalogen (except iodine, see above) and the pyridyl ring, while smaller cc-pVDZ basis sets were used for atoms from the phenyl ring and the methoxy substituent, which are not directly involved in the interaction. The MP2(Full) keyword was employed to include correlation effects for all electrons. The M06-2X functional was chosen because it was found to produce geometries for the halogen-bonded complexes which are in close agreement with those obtained at the MP2 level of theory.

Vibrational frequencies were calculated to ensure that optimised geometries correspond to local minima on the potential energy surface. The M06-2X calculations were carried out using the pruned "UltraFine" integration grid. The geometries of all complexes were optimised using the



Boys-Bernardi counterpoise correction (CP)<sup>S2</sup> to reduce the basis set superposition error (BSSE), separating each complex into two fragments, one of which is the dihalogen. Binding energies were calculated by subtracting the sum of the energies of the monomers from the energy of the complex.

### M06-2X Energies and Optimized Geometries of All Complexes

All geometries are in the respective standard orientations used by GAUSSIAN,<sup>S2</sup> all coordinates in Å.

#### 1-OPhPy...Br<sub>2</sub>

CP corrected energy: -5742.0562 Ha

|    |           |           |           |
|----|-----------|-----------|-----------|
| C  | 1.736688  | 0.100853  | -0.036492 |
| C  | 0.985257  | 1.208512  | 0.377299  |
| C  | -0.402998 | 1.136536  | 0.367219  |
| N  | -1.063122 | 0.044399  | -0.021585 |
| C  | -0.363664 | -1.020003 | -0.418594 |
| C  | 1.026024  | -1.035625 | -0.444304 |
| C  | 3.215761  | 0.130229  | -0.041478 |
| C  | 3.912987  | 1.307501  | -0.360918 |
| C  | 5.297065  | 1.338305  | -0.368299 |
| C  | 6.027528  | 0.185928  | -0.045360 |
| C  | 5.352566  | -0.994857 | 0.279200  |
| C  | 3.957854  | -1.009842 | 0.273416  |
| H  | 1.473875  | 2.114014  | 0.731533  |
| H  | -1.015651 | 1.979217  | 0.689269  |
| H  | -0.945386 | -1.886733 | -0.734116 |
| H  | 1.547049  | -1.920052 | -0.805499 |
| H  | 3.360951  | 2.205298  | -0.636144 |
| H  | 5.842231  | 2.243202  | -0.628670 |
| H  | 5.893273  | -1.898880 | 0.543826  |
| H  | 3.443052  | -1.928771 | 0.551430  |
| O  | 7.376495  | 0.314215  | -0.074484 |
| C  | 8.147939  | -0.830812 | 0.241194  |
| H  | 9.191859  | -0.521425 | 0.158123  |
| H  | 7.946992  | -1.646743 | -0.467231 |
| H  | 7.944195  | -1.170841 | 1.266260  |
| Br | -3.521921 | -0.017431 | 0.003261  |
| Br | -5.895524 | -0.082374 | 0.029335  |

#### 4-OPhPy...Br<sub>2</sub>

CP corrected energy: -5859.9527 Ha

|   |           |          |           |
|---|-----------|----------|-----------|
| C | 0.362139  | 0.254571 | -0.070845 |
| C | -0.432901 | 1.304334 | 0.407937  |
| C | -1.816581 | 1.171549 | 0.405952  |

|    |           |           |           |
|----|-----------|-----------|-----------|
| N  | -2.432352 | 0.073185  | -0.034738 |
| C  | -1.691328 | -0.936788 | -0.493792 |
| C  | -0.302719 | -0.889196 | -0.532339 |
| C  | 1.838074  | 0.350199  | -0.087144 |
| C  | 2.479204  | 1.573117  | -0.346379 |
| C  | 3.860412  | 1.666146  | -0.364258 |
| C  | 4.646094  | 0.532050  | -0.112161 |
| C  | 4.026251  | -0.693855 | 0.151882  |
| C  | 2.633887  | -0.771043 | 0.157173  |
| H  | 0.019346  | 2.210550  | 0.805840  |
| H  | -2.462147 | 1.968050  | 0.777533  |
| H  | -2.237944 | -1.810659 | -0.849717 |
| H  | 0.252634  | -1.729296 | -0.944560 |
| H  | 1.885080  | 2.459178  | -0.566901 |
| H  | 4.361290  | 2.607874  | -0.578901 |
| H  | 4.609453  | -1.585640 | 0.361068  |
| H  | 2.163526  | -1.725999 | 0.388151  |
| O  | 5.986451  | 0.721941  | -0.145697 |
| C  | 6.824834  | -0.401952 | 0.096343  |
| H  | 6.615640  | -1.184075 | -0.650600 |
| H  | 6.613719  | -0.809376 | 1.097722  |
| C  | 8.264375  | 0.058742  | -0.000213 |
| H  | 8.428950  | 0.861043  | 0.731843  |
| H  | 8.432221  | 0.489655  | -0.996644 |
| C  | 9.243084  | -1.086194 | 0.247603  |
| H  | 9.055923  | -1.518002 | 1.241485  |
| H  | 9.059837  | -1.887751 | -0.482584 |
| C  | 10.696736 | -0.631818 | 0.153396  |
| H  | 10.908272 | 0.150309  | 0.893884  |
| H  | 10.911735 | -0.220672 | -0.841385 |
| H  | 11.386510 | -1.464518 | 0.332804  |
| Br | -4.881707 | -0.092359 | 0.015792  |
| Br | -7.251394 | -0.253288 | 0.070230  |

### 1-OPhPy...I<sub>2</sub>

CP corrected energy: -1184.9684 Ha (ECP basis on I)

|   |           |           |           |
|---|-----------|-----------|-----------|
| C | 2.739419  | 0.116043  | -0.058475 |
| C | 1.992182  | 1.227150  | 0.353860  |
| C | 0.604085  | 1.165347  | 0.333334  |
| N | -0.064006 | 0.079755  | -0.065036 |
| C | 0.633883  | -0.987484 | -0.462117 |
| C | 2.022995  | -1.012762 | -0.477545 |
| C | 4.218244  | 0.133538  | -0.049260 |
| C | 4.928149  | 1.307777  | -0.351711 |
| C | 6.312333  | 1.327210  | -0.344614 |
| C | 7.030027  | 0.166223  | -0.023338 |
| C | 6.342165  | -1.011674 | 0.284524  |

|   |           |           |           |
|---|-----------|-----------|-----------|
| C | 4.947661  | -1.015274 | 0.263916  |
| H | 2.483795  | 2.127686  | 0.716321  |
| H | -0.002792 | 2.012047  | 0.655939  |
| H | 0.050453  | -1.850050 | -0.786016 |
| H | 2.539590  | -1.899633 | -0.838909 |
| H | 4.386496  | 2.212375  | -0.625297 |
| H | 6.867568  | 2.229614  | -0.591924 |
| H | 6.872757  | -1.922092 | 0.547636  |
| H | 4.422771  | -1.932185 | 0.529375  |
| O | 8.379835  | 0.283689  | -0.037108 |
| C | 9.139031  | -0.869961 | 0.277692  |
| H | 10.186092 | -0.568099 | 0.207972  |
| H | 8.939165  | -1.678635 | -0.439252 |
| H | 8.921791  | -1.216149 | 1.297884  |
| I | -2.658725 | 0.011742  | -0.018391 |
| I | -5.411452 | -0.080034 | 0.048595  |

#### 4-OPhPy...I<sub>2</sub>

CP corrected energy: -1302.8649 Ha (ECP basis on I)

|   |           |           |           |
|---|-----------|-----------|-----------|
| C | 1.475953  | 0.282729  | -0.091459 |
| C | 0.686105  | 1.334040  | 0.392660  |
| C | -0.697936 | 1.211787  | 0.384132  |
| N | -1.323305 | 0.121833  | -0.068215 |
| C | -0.584815 | -0.889256 | -0.533134 |
| C | 0.803720  | -0.851595 | -0.565612 |
| C | 2.952217  | 0.367063  | -0.099588 |
| C | 3.603963  | 1.588338  | -0.339896 |
| C | 4.985788  | 1.670909  | -0.349093 |
| C | 5.761432  | 0.527704  | -0.106623 |
| C | 5.130813  | -0.696763 | 0.138466  |
| C | 3.738023  | -0.763390 | 0.134846  |
| H | 1.142638  | 2.233590  | 0.800499  |
| H | -1.336994 | 2.011196  | 0.760855  |
| H | -1.134213 | -1.757218 | -0.899270 |
| H | 1.353676  | -1.692670 | -0.982884 |
| H | 3.018042  | 2.481716  | -0.552649 |
| H | 5.495044  | 2.611338  | -0.549130 |
| H | 5.706099  | -1.595440 | 0.339835  |
| H | 3.259349  | -1.717585 | 0.351401  |
| O | 7.102935  | 0.707842  | -0.129856 |
| C | 7.931976  | -0.424966 | 0.104018  |
| H | 7.722122  | -1.196398 | -0.653740 |
| H | 7.711338  | -0.842742 | 1.099026  |
| C | 9.375230  | 0.026833  | 0.022440  |
| H | 9.540425  | 0.819106  | 0.765198  |
| H | 9.552653  | 0.468479  | -0.967600 |
| C | 10.344345 | -1.127798 | 0.262930  |
| H | 10.160601 | -1.919187 | -0.478140 |
| H | 10.147549 | -1.570234 | 1.250247  |
| C | 11.801650 | -0.682295 | 0.183979  |
| H | 12.013473 | 0.089295  | 0.935353  |

|   |           |           |           |
|---|-----------|-----------|-----------|
| H | 12.484471 | -1.521858 | 0.357853  |
| H | 12.026176 | -0.260621 | -0.804257 |
| I | -3.910706 | -0.035423 | -0.007665 |
| I | -6.660494 | -0.202245 | 0.073992  |

### 1-OPhPy...IBr

CP corrected energy: -3463.5223 Ha (ECP basis on I)

|    |           |           |           |
|----|-----------|-----------|-----------|
| C  | 2.134781  | 0.098011  | -0.032326 |
| C  | 1.382120  | 1.207598  | 0.375348  |
| C  | -0.004733 | 1.136643  | 0.367496  |
| N  | -0.665030 | 0.039824  | -0.014850 |
| C  | 0.035426  | -1.028482 | -0.406515 |
| C  | 1.423710  | -1.041474 | -0.432358 |
| C  | 3.612773  | 0.128780  | -0.039378 |
| C  | 4.308010  | 1.308082  | -0.356616 |
| C  | 5.691705  | 1.340104  | -0.366289 |
| C  | 6.423879  | 0.187383  | -0.047161 |
| C  | 5.750582  | -0.995206 | 0.275533  |
| C  | 4.356237  | -1.011837 | 0.271284  |
| H  | 1.869269  | 2.115855  | 0.723872  |
| H  | -0.617874 | 1.980382  | 0.684838  |
| H  | -0.546120 | -1.896931 | -0.716612 |
| H  | 1.943857  | -1.928058 | -0.788890 |
| H  | 3.755236  | 2.206180  | -0.629273 |
| H  | 6.235662  | 2.246023  | -0.625458 |
| H  | 6.292751  | -1.899111 | 0.537382  |
| H  | 3.843342  | -1.932166 | 0.548128  |
| O  | 7.771565  | 0.317169  | -0.077902 |
| C  | 8.546074  | -0.827500 | 0.233746  |
| H  | 9.589052  | -0.515516 | 0.149589  |
| H  | 8.345405  | -1.641706 | -0.476598 |
| H  | 8.344610  | -1.170020 | 1.258337  |
| I  | -3.161137 | -0.014944 | 0.003532  |
| Br | -5.742731 | -0.074333 | 0.023373  |

### 4-OPhPy...IBr

CP corrected energy: -3581.4188 Ha (ECP basis on I)

|   |           |           |           |
|---|-----------|-----------|-----------|
| C | 0.832991  | 0.257792  | -0.061085 |
| C | 0.038987  | 1.313775  | 0.406780  |
| C | -1.343612 | 1.185161  | 0.407656  |
| N | -1.962008 | 0.081172  | -0.021460 |
| C | -1.221975 | -0.936791 | -0.470427 |
| C | 0.165217  | -0.890077 | -0.509260 |
| C | 2.307927  | 0.351589  | -0.080349 |
| C | 2.949489  | 1.573941  | -0.342432 |
| C | 4.330397  | 1.665286  | -0.363694 |
| C | 5.115545  | 0.530446  | -0.111477 |
| C | 4.494945  | -0.694733 | 0.155805  |
| C | 3.102881  | -0.770628 | 0.163668  |

|    |           |           |           |
|----|-----------|-----------|-----------|
| H  | 0.491662  | 2.223843  | 0.794702  |
| H  | -1.987810 | 1.986323  | 0.770606  |
| H  | -1.770268 | -1.813067 | -0.816883 |
| H  | 0.717794  | -1.735844 | -0.912995 |
| H  | 2.356419  | 2.460527  | -0.563550 |
| H  | 4.831909  | 2.605998  | -0.581079 |
| H  | 5.077814  | -1.586602 | 0.365352  |
| H  | 2.632602  | -1.724934 | 0.397414  |
| O  | 6.454847  | 0.718911  | -0.148159 |
| C  | 7.294207  | -0.405157 | 0.093420  |
| H  | 7.082784  | -1.187883 | -0.652142 |
| H  | 7.085233  | -0.810770 | 1.095893  |
| C  | 8.733336  | 0.055640  | -0.007400 |
| H  | 8.898653  | 0.485083  | -1.004865 |
| H  | 8.899639  | 0.858947  | 0.723128  |
| C  | 9.712674  | -1.088966 | 0.239642  |
| H  | 9.527702  | -1.891562 | -0.488956 |
| H  | 9.528064  | -1.519309 | 1.234628  |
| C  | 11.165982 | -0.634436 | 0.141102  |
| H  | 11.856228 | -1.466810 | 0.320000  |
| H  | 11.378443 | -0.224770 | -0.854818 |
| H  | 11.379284 | 0.148751  | 0.879939  |
| I  | -4.451615 | -0.074533 | 0.014842  |
| Br | -7.029406 | -0.235835 | 0.053451  |

### 1-OPhPy...ICI

CP corrected energy: -1349.5260 Ha (ECP basis on I)

|   |           |           |           |
|---|-----------|-----------|-----------|
| C | 1.494365  | 0.097631  | -0.035984 |
| C | 0.739412  | 1.205792  | 0.371443  |
| C | -0.647125 | 1.132378  | 0.363870  |
| N | -1.305232 | 0.033878  | -0.018467 |
| C | -0.602628 | -1.033231 | -0.410601 |
| C | 0.785442  | -1.043103 | -0.436399 |
| C | 2.972196  | 0.130707  | -0.041901 |
| C | 3.666047  | 1.311309  | -0.357399 |
| C | 5.049683  | 1.345249  | -0.365646 |
| C | 5.783165  | 0.193273  | -0.046685 |
| C | 5.111209  | -0.990561 | 0.274326  |
| C | 3.716942  | -1.009164 | 0.268569  |
| H | 1.224632  | 2.114998  | 0.720088  |
| H | -1.262295 | 1.974416  | 0.681478  |
| H | -1.182868 | -1.902521 | -0.720474 |
| H | 1.307211  | -1.928664 | -0.792992 |
| H | 3.112333  | 2.208889  | -0.629851 |
| H | 5.592649  | 2.252136  | -0.623490 |
| H | 5.654378  | -1.893896 | 0.536052  |
| H | 3.205110  | -1.930435 | 0.544226  |
| O | 7.130603  | 0.324968  | -0.075844 |
| C | 7.906470  | -0.818791 | 0.235993  |
| H | 8.949067  | -0.505177 | 0.153291  |
| H | 7.707862  | -1.632798 | -0.475145 |

|    |           |           |          |
|----|-----------|-----------|----------|
| H  | 7.704263  | -1.162248 | 1.260116 |
| I  | -3.776216 | -0.032934 | 0.009164 |
| Cl | -6.213658 | -0.106767 | 0.039971 |

#### 4-OPhPy...ICI

CP corrected energy: -1467.4225 Ha (ECP basis on I)

|    |           |           |           |
|----|-----------|-----------|-----------|
| C  | 0.150492  | 0.247012  | -0.081038 |
| C  | -0.648807 | 1.295408  | 0.394893  |
| C  | -2.030534 | 1.159610  | 0.396475  |
| N  | -2.643418 | 0.055186  | -0.040285 |
| C  | -1.898368 | -0.955203 | -0.498879 |
| C  | -0.511741 | -0.900349 | -0.538735 |
| C  | 1.624949  | 0.346981  | -0.096753 |
| C  | 2.262587  | 1.574075  | -0.346002 |
| C  | 3.643196  | 1.670966  | -0.361411 |
| C  | 4.431903  | 0.537090  | -0.115795 |
| C  | 3.815141  | -0.692876 | 0.138188  |
| C  | 2.423429  | -0.774288 | 0.140186  |
| H  | -0.200768 | 2.204697  | 0.789878  |
| H  | -2.678949 | 1.953735  | 0.767006  |
| H  | -2.442699 | -1.831579 | -0.850991 |
| H  | 0.044867  | -1.740030 | -0.949485 |
| H  | 1.666860  | 2.460304  | -0.561366 |
| H  | 4.141784  | 2.615523  | -0.568593 |
| H  | 4.400706  | -1.584255 | 0.342176  |
| H  | 1.956129  | -1.732399 | 0.364103  |
| O  | 5.770514  | 0.731082  | -0.144954 |
| C  | 6.613123  | -0.391394 | 0.093105  |
| H  | 6.409682  | -1.169091 | -0.659897 |
| H  | 6.399439  | -0.805677 | 1.091020  |
| C  | 8.050978  | 0.075934  | 0.005290  |
| H  | 8.209290  | 0.874063  | 0.743234  |
| H  | 8.221185  | 0.513859  | -0.987646 |
| C  | 9.033084  | -1.066847 | 0.249884  |
| H  | 8.856419  | -1.864152 | -0.486543 |
| H  | 8.843160  | -1.506048 | 1.239986  |
| C  | 10.485266 | -0.605931 | 0.165430  |
| H  | 10.690298 | 0.171821  | 0.912304  |
| H  | 11.177438 | -1.437143 | 0.342260  |
| H  | 10.703161 | -0.187126 | -0.825496 |
| I  | -5.105848 | -0.129556 | 0.029814  |
| Cl | -7.536262 | -0.319183 | 0.111206  |

#### Py...Br<sub>2</sub>

CP corrected energy: -5396.5603 Ha

|   |          |           |           |
|---|----------|-----------|-----------|
| N | 0.000000 | 0.000000  | -1.774816 |
| C | 0.000000 | 1.150935  | -2.448875 |
| C | 0.000000 | -1.150935 | -2.448875 |
| C | 0.000000 | -1.199816 | -3.841167 |

|    |          |           |           |
|----|----------|-----------|-----------|
| C  | 0.000000 | -0.000000 | -4.548352 |
| C  | 0.000000 | 1.199816  | -3.841167 |
| H  | 0.000000 | 2.060343  | -1.846969 |
| H  | 0.000000 | -2.060343 | -1.846969 |
| H  | 0.000000 | -2.160108 | -4.352621 |
| H  | 0.000000 | 0.000000  | -5.637588 |
| H  | 0.000000 | 2.160108  | -4.352621 |
| Br | 0.000000 | 0.000000  | 3.086127  |
| Br | 0.000000 | 0.000000  | 0.720475  |

**Py...I<sub>2</sub>**

CP corrected energy: -839.4726 Ha (ECP basis on I)

|   |          |           |           |
|---|----------|-----------|-----------|
| N | 0.000000 | 0.000000  | -2.467874 |
| C | 0.000000 | 1.151029  | -3.144271 |
| C | 0.000000 | -1.151029 | -3.144271 |
| C | 0.000000 | -1.199580 | -4.536121 |
| C | 0.000000 | -0.000000 | -5.243610 |
| C | 0.000000 | 1.199580  | -4.536121 |
| H | 0.000000 | 2.061553  | -2.543976 |
| H | 0.000000 | -2.061553 | -2.543976 |
| H | 0.000000 | -2.160090 | -5.047044 |
| H | 0.000000 | 0.000000  | -6.332814 |
| H | 0.000000 | 2.160090  | -5.047044 |
| I | 0.000000 | 0.000000  | 2.905819  |
| I | 0.000000 | 0.000000  | 0.158640  |

**Py...IBr**

CP corrected energy: -3118.0259 Ha (ECP basis on I)

|    |          |           |           |
|----|----------|-----------|-----------|
| N  | 0.000000 | 0.000000  | -1.948119 |
| C  | 0.000000 | 1.153310  | -2.621574 |
| C  | 0.000000 | -1.153310 | -2.621574 |
| C  | 0.000000 | -1.199930 | -4.012753 |
| C  | 0.000000 | 0.000000  | -4.719706 |
| C  | 0.000000 | 1.199930  | -4.012753 |
| H  | 0.000000 | 2.061794  | -2.018833 |
| H  | 0.000000 | -2.061794 | -2.018833 |
| H  | 0.000000 | -2.160292 | -4.523686 |
| H  | 0.000000 | 0.000000  | -5.808820 |
| H  | 0.000000 | 2.160292  | -4.523686 |
| Br | 0.000000 | -0.000000 | 3.146738  |
| I  | 0.000000 | -0.000000 | 0.572170  |

**Py...ICI**

CP corrected energy: -1004.0294 Ha (ECP basis on I)

|   |          |          |           |
|---|----------|----------|-----------|
| N | 0.000000 | 0.000000 | -1.403321 |
| C | 0.000000 | 1.153739 | -2.076629 |

|    |          |           |           |
|----|----------|-----------|-----------|
| C  | 0.000000 | -1.153739 | -2.076629 |
| C  | 0.000000 | -1.199931 | -3.467616 |
| C  | 0.000000 | -0.000000 | -4.174551 |
| C  | 0.000000 | 1.199931  | -3.467616 |
| H  | 0.000000 | 2.061783  | -1.473404 |
| H  | 0.000000 | -2.061783 | -1.473404 |
| H  | 0.000000 | -2.160295 | -3.978473 |
| H  | 0.000000 | -0.000000 | -5.263648 |
| H  | 0.000000 | 2.160295  | -3.978473 |
| Cl | 0.000000 | 0.000000  | 3.520840  |
| I  | 0.000000 | 0.000000  | 1.088955  |

## References

- S1 S. F. Boys and F. Bernardi, *Mol. Phys.*, 1970, **19**, 553-566.
- S2 Gaussian 16, Revision A.03, M. J. Frisch, G. W. Trucks, H. B. Schlegel, G. E. Scuseria, M. A. Robb, J. R. Cheeseman, G. Scalmani, V. Barone, G. A. Petersson, H. Nakatsuji, X. Li, M. Caricato, A. V. Marenich, J. Bloino, B. G. Janesko, R. Gomperts, B. Mennucci, H. P. Hratchian, J. V. Ortiz, A. F. Izmaylov, J. L. Sonnenberg, D. Williams-Young, F. Ding, F. Lipparini, F. Egidi, J. Goings, B. Peng, A. Petrone, T. Henderson, D. Ranasinghe, V. G. Zakrzewski, J. Gao, N. Rega, G. Zheng, W. Liang, M. Hada, M. Ehara, K. Toyota, R. Fukuda, J. Hasegawa, M. Ishida, T. Nakajima, Y. Honda, O. Kitao, H. Nakai, T. Vreven, K. Throssell, J. A. Montgomery, Jr., J. E. Peralta, F. Ogliaro, M. J. Bearpark, J. J. Heyd, E. N. Brothers, K. N. Kudin, V. N. Staroverov, T. A. Keith, R. Kobayashi, J. Normand, K. Raghavachari, A. P. Rendell, J. C. Burant, S. S. Iyengar, J. Tomasi, M. Cossi, J. M. Millam, M. Klene, C. Adamo, R. Cammi, J. W. Ochterski, R. L. Martin, K. Morokuma, O. Farkas, J. B. Foresman, and D. J. Fox, Gaussian, Inc., Wallingford CT, 2016; see <http://www.gaussian.com/>.
